RESEARCH ARTICLE

# Effect of acute pancreatitis on the risk of developing osteoporosis: A nationwide cohort study

Shih-Yi Lin<sup>1,2</sup>, Wu-Huei Hsu<sup>1,3</sup>, Cheng-Chieh Lin<sup>1,4</sup>, Cheng-Li Lin<sup>5,6</sup>, Chung-Hao Tsai<sup>7</sup>, Chia-Hung Kao<sup>1,8,9\*</sup>

**1** Graduate Institute of Clinical Medical Science, College of Medicine, China Medical University, Taichung, Taiwan, **2** Division of Nephrology and Kidney Institute, China Medical University Hospital, Taichung, Taiwan, **3** Department of Chest, China Medical University Hospital, Taichung, Taiwan, **4** Department of Family Medicine, China Medical University Hospital, Taichung, Taiwan, **5** Management Office for Health Data, China Medical University Hospital, Taichung, Taiwan, **6** College of Medicine, China Medical University, Taichung, Taiwan, **7** Department of Orthopedics, China Medical University Hospital, Taichung, Taiwan, **8** Department of Nuclear Medicine and PET Center, China Medical University Hospital, Taichung, Taiwan, **9** Department of Bioinformatics and Medical Engineering, Asia University, Taichung, Taiwan

\* [d10040@mail.cmuh.org.tw](mailto:d10040@mail.cmuh.org.tw)

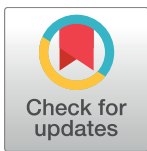

**OPEN ACCESS**

**Citation:** Lin S-Y, Hsu W-H, Lin C-C, Lin C-L, Tsai C-H, Kao C-H (2017) Effect of acute pancreatitis on the risk of developing osteoporosis: A nationwide cohort study. PLoS ONE 12(6): e0179358. <https://doi.org/10.1371/journal.pone.0179358>

**Editor:** Juan Sastre, Universitat de Valencia, SPAIN

**Received:** February 6, 2017

**Accepted:** May 27, 2017

**Published:** June 12, 2017

**Copyright:** © 2017 Lin et al. This is an open access article distributed under the terms of the [Creative Commons Attribution License](https://creativecommons.org/licenses/by/4.0/), which permits unrestricted use, distribution, and reproduction in any medium, provided the original author and source are credited.

**Data Availability Statement:** The dataset used in this study is held by the Taiwan Ministry of Health and Welfare (MOHW). The Ministry of Health and Welfare must approve our application to access this data. Any researcher interested in accessing this dataset can submit an application form to the Ministry of Health and Welfare requesting access. Please contact the staff of MOHW (Email: [stcarolwu@mohw.gov.tw](mailto:stcarolwu@mohw.gov.tw)) for further assistance. Taiwan Ministry of Health and Welfare Address: No.488, Sec. 6, Zhongxiao E. Rd., Nangang Dist., Taipei City 115, Taiwan (R.O.C.). Phone: +886-2-8590-6848. All relevant data are within the paper.

## Abstract

### Purpose

Chronic exocrine pancreatic insufficiency can lead to osteoporosis. However, the incidence and risk of osteoporosis after acute inflammation of pancreas remained known. Thus, we conducted a population-based cohort study to clarify the association between acute pancreatitis (AP) and osteoporosis.

### Methods

Patients newly diagnosed with AP with index date between 2000 and 2011 were identified from the National Health Insurance Research Database. Osteoporosis were defined according to the International Classification of Diseases, Ninth Revision, Clinical Modification codes. We applied age-, sex-, and comorbidities-adjusted variable Cox proportional hazard models for assessing the association between AP and osteoporosis. Moreover, these models were used to adjust for the influences of patient characteristics and comorbidities.

### Results

In this study, 4,016 patients were included in the AP cohort (males, 67.9%; mean age, 51.8 years) and 4,016 matched controls in the non-AP cohort. After a mean follow-up period of 4.97 and 5.21 years in the AP and non-AP cohorts, respectively, the incidence of osteoporosis was 8.22 per 1000 person-years in the AP cohort. The AP cohort had a higher risk [adjusted hazard ratio (aHR) = 1.27, 95% confidence interval (CI) = 1.02–1.58] of osteoporosis than did the non-AP cohort. The risk of osteoporosis was highest in the female patients of the AP cohort (aHR = 2.26, 95% CI = 1.85–2.76) and patients aged 50–64 years (aHR = 4.14, 95% CI = 3.13–5.47).

**Funding:** This study was supported by the grants from the Taiwan Ministry of Health and Welfare Clinical Trial and Research Center of Excellence, (MOHW105-TDU-B-212-133019); China Medical University Hospital and the Academia Sinica Taiwan Biobank Stroke Biosignature Project (BM10501010037); the NRPB Stroke Clinical Trial Consortium (MOST105-2325-B-039-003); the Tseng-Lien Lin Foundation, Taichung, Taiwan; the Taiwan Brain Disease Foundation, Taipei, Taiwan; Katsuzo and Kiyo Aoshima Memorial Funds, Japan. The funders had no role in the study design, data collection and analysis, decision to publish, or preparation of the manuscript. No additional external funding was received for this study.

**Competing interests:** The authors have declared that no competing interests exist.

**Abbreviations:** aHR, adjusted hazard ratio; AP, acute pancreatitis; CI, confidence interval; CP, Chronic pancreatitis; ICD-9-CM, International Classification of Diseases, Ninth Revision, Clinical Modification; LHID2000, Longitudinal Health Insurance Database 2000; NHIRD, National Health Insurance Registration Database.

## Conclusion

AP patients are at a risk of osteoporosis, especially female gender and age 50–64 years. Those with > 3 episodes of AP had highest significant risk of developing osteoporosis.

## Introduction

Osteoporosis, characterized by reduced bone mineral density and distorted bone microstructure, markedly increases the risk of fractures [1, 2]. Osteoporotic fractures typically develop after low-energy traumas to the hip, spine, proximal humerus, and forearm [3]. Furthermore, achieving full recovery of osteoporotic fractures is difficult. Patients with osteoporotic fractures, particularly elderly patients, often lose activities of daily living and independence. Approximately 20% of the patients with osteoporotic fractures required long-term nursing care, and approximately 20% died one year later [4]. Thus, early detection and prevention of osteoporosis is a critical step for reducing the national economic and care burden. Osteoporosis is defined as bone mineral density measured by dual energy X-ray absorptiometry of the lumbar spine, T-score  $\leq -2.5$  SD, or presence of fragility fractures [5]. Pharmacological prevention and intervention of osteoporosis includes provision of calcium supplement (1,200 mg/day), vitamin D (800–1,000 IU/day), bisphosphonate, raloxifene, denosumab, teriparatide, and calcitonin or hormone therapy [1]. Nonpharmacological interventions for osteoporosis include moderate exercise, adequate sunlight exposure, smoking cessation, and most importantly, identification of risk factors [4].

Clinical risk factors for osteoporosis, including postmenopausal complications, long-term steroid use, alcoholism, rheumatological disorders, renal failures, gastrointestinal disorders (gastric bypass, biliary cirrhosis, and pancreatic insufficiency), and malnutrition (anorexia nervosa, vitamin A excess, and vitamin D deficiency) have been identified [6, 7]. Chronic pancreatitis (CP) has been reported to be associated with osteoporosis and decreased bone mineral density [1, 7]. It has been reported that even one episode of AP may progress to CP-like lesions with calcifications [8]. However, whether acute inflammation of the pancreas is associated with osteoporosis still remains unknown. Therefore, we used the National Health Insurance Registration Database (NHIRD) for investigating the association between acute pancreatitis (AP) and osteoporosis.

## Methods

### Data source

All data used in this study were retrieved from the Longitudinal Health Insurance Database 2000 (LHID2000)—a subset of the NHIRD. The LHID2000 contains longitudinal data (1996–2011) on medical claims for 1 million individuals randomly selected from the 2000 Registry of Beneficiaries (approximately 24 million) of Taiwan's National Health Insurance (NHI) program [9]. Data from the LHID2000 have been used successfully in numerous epidemiological studies [9–11].

### Ethics statement

The NHIRD encrypts patient personal information to protect privacy and provides researchers with anonymous identification numbers associated with relevant claims information, including sex, date of birth, medical services received, and prescriptions. Therefore, patient consent

is not required to access the NHIRD. This study was approved to fulfill the condition for exemption by the Institutional Review Board (IRB) of China Medical University (CMUH104-REC2-115-CR1). The IRB also specifically waived the consent requirement.

## Participants

The AP cohort included patients newly diagnosed with acute pancreatitis [the International Classification of Diseases, Ninth Revision, Clinical Modification (ICD-9-CM) 577.0] from 2000 to 2010; In this study, the criteria of acute pancreatitis (AP) cohort are defined as who had the main diagnosis of AP (ICD-9 577.0) in inpatient benefit claims of NHIRD. Each diagnosis of AP is based on clinicians' decisions of typical abdominal pain, elevating levels of amylase and lipase, and imaging findings, although the laboratory information is unavailable in this NHIRD releasing for research purpose. Professionals in NHI periodically supervise and review these diagnosis and laboratory information to ensure the diagnosis and avoid wastes of medical resources. Thus, in NHIRD, the diagnosis of AP is according to the well-established and updated international criteria. The accuracy of AP diagnosis (ICD-9-CM-577.0) in NHIRD has been validated and been used to conduct several NHIRD-based studies [12–14]. The diagnosis of AP is accurate in this study. The first diagnosis date of AP was considered the index date. Patients with a history of CP (ICD-9-CM 577.0), those with osteoporosis (ICD-9-CM 733.0, 733.1) before index date, or those aged <20 years were excluded. The non-AP cohort was also identified during 2000–2010, with an exclusion criteria similar to that of the AP cohort. A propensity score matching (1:1) was performed in the AP and non-AP cohorts. The propensity score was calculated using logistic regression analysis for estimating the probability of osteoporosis, given baseline variables, including age, hypertension (ICD-9-CM 401–405), diabetes mellitus (ICD-9-CM 250), hyperlipidemia (ICD-9-CM 272), stroke (ICD-9-CM 430–438), chronic obstructive pulmonary disease (COPD; ICD-9-CM 491, 492, and 496), cirrhosis (ICD-9-CM 571.2, 571.5, and 571.6), chronic kidney disease (ICD-9-CM 580–589), cancer (ICD-9-CM 140–208), folate deficiency (ICD-9-CM 281), depression (ICD-9-CM 296.2, 296.3, 300.4, and 311), hyperthyroidism (ICD-9-CM 242), hypothyroidism (ICD-9-CM 244), fibromyalgia (ICD-9-CM 729.0 and 729.1), coronary artery disease (ICD-9-CM 410–414), alcohol-related diseases (ICD-9-CM 291, 303, 305.0, 571.0–571.3, 790.3, and V11.3), biliary stone (ICD-9-CM 574), asthma (ICD-9-CM 493), hypercalcemia (ICD-9-CM 275.42), and hyperparathyroidism (ICD-9-CM 252), and medication of steroid. Severe acute pancreatitis is considered here as acute pancreatitis coexisting with acute kidney injury (ICD-9-CM 584) or multiple organ failure (ICD-9-CM 995.92) or acute liver failure (ICD-9-CM 570).

## Outcome measurements

Both AP and non-AP cohorts were followed until osteoporosis diagnosis, death, withdrawal from the NHI program, or the end of 2011, whichever occurred first.

## Statistical analysis

The differences in the demographic characteristics of the AP and non-AP cohorts were evaluated using the chi-squared and Student's *t* tests for categorical and continuous variables, respectively. The different risk factors for osteoporosis were identified and stratified by age, sex, and comorbidities in both the cohorts. Univariable and multivariable competing-risks regression models were used for estimating the subhazard ratios (SHRs) with 95% confidence intervals (CIs) for osteoporosis associated with AP. The multivariable models were adjusted for age, sex, and comorbidities, namely hypertension, folate deficiency, depression, fibromyalgia, and coronary artery disease. We estimated the cohort-specific probability for osteoporosis

by directly adjusting the survival function for age, sex, and comorbidities in the multivariable competing-risks Cox model. SAS version 9.4 for Windows (SAS Institute, Cary, NC, USA) was used for conducting statistical analyses.  $P < .05$  was considered significant for a 2-tailed test.

## Results

As demonstrated in Table 1, both cohorts exhibited similar age, sex, and comorbidity distributions, and the patients were predominantly male (68.1%). The mean ages in the AP and non-AP cohorts were 51.8 (SD = 17.2) and 52.5 (SD = 17.0) years, respectively. In the AP and non-AP cohorts, hypertension (39.7% vs 38.3%, respectively) was the predominant comorbidity followed by cirrhosis (36.9% vs 34.7%, respectively), hyperlipidemia (27.9% vs 27.4%, respectively), and coronary artery disease (19.1% vs 19.3%, respectively). The mean follow-up

**Table 1. Characteristics between subjects with and without acute pancreatitis.**

|                                        | Acute pancreatitis |      |            |      | p-value |
|----------------------------------------|--------------------|------|------------|------|---------|
|                                        | Yes                |      | No         |      |         |
|                                        | (N = 4016)         |      | (N = 4016) |      |         |
|                                        | n                  | %    | n          | %    |         |
| <b>Age, year Mean (SD)<sup>#</sup></b> | 51.8               | 17.2 | 52.5       | 17.0 | 0.08    |
| <b>Sex</b>                             |                    |      |            |      | 0.79    |
| Female                                 | 1291               | 32.2 | 1280       | 31.9 |         |
| Male                                   | 2725               | 67.9 | 2736       | 68.1 |         |
| <b>Comorbidity</b>                     |                    |      |            |      |         |
| Hypertension                           | 1537               | 38.3 | 1594       | 39.7 | 0.19    |
| Diabetes mellitus                      | 695                | 17.3 | 714        | 17.8 | 0.58    |
| Hyperlipidemia                         | 1101               | 27.4 | 1120       | 27.9 | 0.64    |
| Stroke                                 | 305                | 7.59 | 337        | 8.39 | 0.19    |
| COPD                                   | 569                | 14.2 | 606        | 15.1 | 0.24    |
| Cirrhosis                              | 1393               | 34.7 | 1483       | 36.9 | 0.04    |
| CKD                                    | 183                | 4.56 | 179        | 4.46 | 0.83    |
| Cancer                                 | 198                | 4.93 | 198        | 4.93 | 0.99    |
| Folate deficiency                      | 25                 | 0.62 | 24         | 0.60 | 0.89    |
| Depression                             | 281                | 7.00 | 267        | 6.65 | 0.54    |
| Hyperthyroidism                        | 48                 | 1.20 | 46         | 1.15 | 0.84    |
| Hypothyroidism                         | 22                 | 0.55 | 23         | 0.57 | 0.88    |
| Fibromyalgia                           | 714                | 17.8 | 724        | 18.0 | 0.77    |
| Coronary artery disease                | 773                | 19.3 | 765        | 19.1 | 0.82    |
| Alcohol-related diseases               | 590                | 14.7 | 639        | 15.9 | 0.13    |
| Biliary stone                          | 401                | 9.99 | 453        | 11.3 | 0.06    |
| Asthma                                 | 315                | 7.84 | 329        | 8.19 | 0.57    |
| Hypercalcemia                          | 3                  | 0.07 | 1          | 0.02 | 0.32    |
| Hyperparathyroidism                    | 12                 | 0.30 | 9          | 0.22 | 0.51    |
| <b>Coexisting complications</b>        |                    |      |            |      |         |
| Sepsis                                 | 39                 | 0.97 | 111        | 2.76 | 0.001   |
| Biliary tract disease                  | 47                 | 1.17 | 73         | 1.82 | 0.02    |
| <b>Medication</b>                      |                    |      |            |      |         |
| Steroid                                | 347                | 8.64 | 332        | 8.27 | 0.55    |

Chi-square test;

<sup>#</sup> Student's t-test;

<https://doi.org/10.1371/journal.pone.0179358.t001>

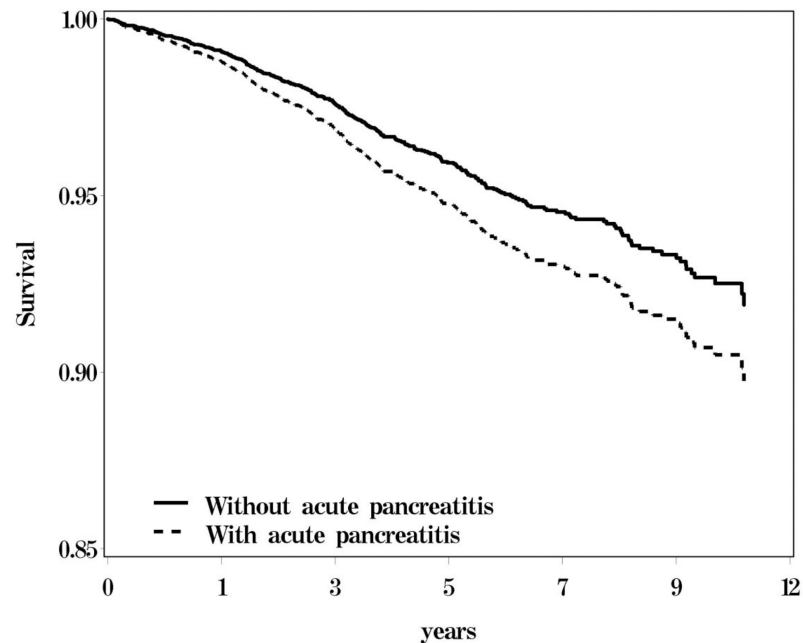

**Fig 1. Probability for osteoporosis between subjects with and without acute pancreatitis.**

<https://doi.org/10.1371/journal.pone.0179358.g001>

periods of AP and non-AP cohorts were 4.97 and 5.21 years, respectively. In AP cohort, 17 cases are defined as severe acute pancreatitis. Among these 17 severe acute pancreatitis patients, none of them develop osteoporosis.

Fig 1 presents the 12-year probability for osteoporosis associated with AP adjusted for age, sex, and comorbidities. The patients with cholangitis and those without AP exhibited significant differences in their probability values for osteoporosis. The overall incidence of osteoporosis (per 1000 person-years) in the AP and non-AP cohorts was 8.22 and 7.03, respectively (crude SHR = 1.35, 95% CI = 1.09–1.68; Table 2). After adjustment for all confounding factors in the competing-risks regression model, the risk of osteoporosis remained significantly increased in the presence of AP (adjusted SHR = 1.27, 95% CI = 1.02–1.58). Compared with patients aged  $\leq 49$  years, those aged 50–64 years had a 4.14-fold risk (95% CI = 3.13–5.47) of osteoporosis, and patients aged  $\geq 65$  years had a 2.01-fold risk (95% CI = 1.53–2.65) of osteoporosis. The risk of osteoporosis was 2.26-fold higher in women than in men (95% CI = 1.85–2.76).

Table 3 presents the comparison of the SHRs for osteoporosis obtained from the competing-risks regression models for the AP and non-AP cohorts stratified by age, sex, and comorbidities. The incidence of osteoporosis increased with age in both the cohorts. The age-specific relative risk of osteoporosis in the AP cohort was higher than that in the non-AP cohort for patients aged 50–64 years (adjusted SHR = 1.99, 95% CI = 1.33–2.97). The sex-specific relative risk of osteoporosis in the AP cohort was higher than that in the non-AP cohort for women (adjusted SHR = 1.43, 95% CI = 1.10–1.85). Table 4 indicates that compared with patients without AP, patients who experienced  $>3$  episodes of AP had a 4.76-fold risk of osteoporosis.

## Discussion

To our knowledge, this study is the first reporting the association of AP with osteoporosis, especially with the significant risk factors, including female gender and age  $> 65$  years. In the

**Table 2. The incidences and risk factors for osteoporosis.**

| Variable                  | Event | PY    | Rate <sup>#</sup> | Crude SHR (95% CI)  | Adjusted SHR <sup>§</sup> (95% CI) |
|---------------------------|-------|-------|-------------------|---------------------|------------------------------------|
| <b>Acute pancreatitis</b> |       |       |                   |                     |                                    |
| No                        | 147   | 20918 | 7.03              | 1.00                | 1.00                               |
| Yes                       | 164   | 19961 | 8.22              | 1.35(1.09, 1.68)**  | 1.27(1.02, 1.58)*                  |
| <b>Age, year</b>          |       |       |                   |                     |                                    |
| 20–49                     | 43    | 23449 | 1.83              | 1.00                | 1.00                               |
| 50–64                     | 94    | 9557  | 9.84              | 3.14(2.44, 4.05)*** | 4.14(3.13, 5.47)***                |
| ≥ 65                      | 174   | 7874  | 22.1              | 6.45(5.22, 8.00)*** | 2.01(1.53, 2.65)***                |
| <b>Sex</b>                |       |       |                   |                     |                                    |
| Female                    | 202   | 12841 | 15.7              | 2.82(2.27, 3.50)*** | 2.26(1.85, 2.76)***                |
| Male                      | 109   | 28039 | 3.89              | 1.00                | 1.00                               |
| <b>Comorbidity</b>        |       |       |                   |                     |                                    |
| <b>Hypertension</b>       |       |       |                   |                     |                                    |
| No                        | 115   | 27130 | 4.24              | 1.00                | 1.00                               |
| Yes                       | 196   | 13750 | 14.3              | 1.47(1.14, 1.89)**  | 1.05(0.81, 1.35)                   |
| <b>Diabetes mellitus</b>  |       |       |                   |                     |                                    |
| No                        | 238   | 34740 | 6.85              | 1.00                | 1.00                               |
| Yes                       | 73    | 6140  | 11.9              | 1.09(0.83, 1.42)    | -                                  |
| <b>Hyperlipidemia</b>     |       |       |                   |                     |                                    |
| No                        | 210   | 30211 | 6.95              | 1.00                | 1.00                               |
| Yes                       | 101   | 10669 | 9.47              | 1.01(0.80, 1.27)    | -                                  |
| <b>Stroke</b>             |       |       |                   |                     |                                    |
| No                        | 227   | 38802 | 7.14              | 1.00                | 1.00                               |
| Yes                       | 34    | 2078  | 16.4              | 0.88(0.60, 1.29)    | -                                  |
| <b>COPD</b>               |       |       |                   |                     |                                    |
| No                        | 239   | 36099 | 6.62              | 1.00                | 1.00                               |
| Yes                       | 72    | 4781  | 15.1              | 1.29(0.99, 1.67)    | -                                  |
| <b>Cirrhosis</b>          |       |       |                   |                     |                                    |
| No                        | 175   | 26441 | 6.62              | 1.00                | 1.00                               |
| Yes                       | 136   | 14439 | 9.42              | 1.15(0.93, 1.43)    | -                                  |
| <b>CKD</b>                |       |       |                   |                     |                                    |
| No                        | 294   | 39668 | 7.41              | 1.00                | 1.00                               |
| Yes                       | 17    | 1212  | 14.0              | 1.07(0.67, 1.70)    | -                                  |
| <b>Cancer</b>             |       |       |                   |                     |                                    |
| No                        | 297   | 39794 | 7.46              | 1.00                | 1.00                               |
| Yes                       | 14    | 1086  | 12.9              | 0.89(0.52, 1.53)    | -                                  |
| <b>Folate deficiency</b>  |       |       |                   |                     |                                    |
| No                        | 307   | 40734 | 7.54              | 1.00                | 1.00                               |
| Yes                       | 4     | 146   | 27.4              | 2.45(1.01, 5.94)*   | 1.84(0.68, 4.93)                   |
| <b>Depression</b>         |       |       |                   |                     |                                    |
| No                        | 281   | 38557 | 7.29              | 1.00                | 1.00                               |
| Yes                       | 30    | 2323  | 12.9              | 1.53(1.07, 2.20)*   | 1.08(0.74, 1.58)                   |
| <b>Hyperthyroidism</b>    |       |       |                   |                     |                                    |
| No                        | 306   | 40490 | 7.56              | 1.00                | 1.00                               |
| Yes                       | 5     | 390   | 12.8              | 1.02(0.38, 2.74)    | -                                  |
| <b>Hypothyroidism</b>     |       |       |                   |                     |                                    |
| No                        | 308   | 40725 | 7.56              | 1.00                | 1.00                               |
| Yes                       | 3     | 155   | 19.3              | 2.37(0.88, 6.35)    | -                                  |

(Continued)

Table 2. (Continued)

| Variable                        | Event | PY    | Rate <sup>#</sup> | Crude SHR (95% CI)  | Adjusted SHR <sup>&amp;</sup> (95% CI) |
|---------------------------------|-------|-------|-------------------|---------------------|----------------------------------------|
| <b>Fibromyalgia</b>             |       |       |                   |                     |                                        |
| No                              | 234   | 34620 | 6.76              | 1.00                | 1.00                                   |
| Yes                             | 77    | 6260  | 12.3              | 1.58(1.24, 2.02)*** | 1.13(0.87, 1.46)                       |
| <b>Coronary artery disease</b>  |       |       |                   |                     |                                        |
| No                              | 207   | 34367 | 6.02              | 1.00                | 1.00                                   |
| Yes                             | 104   | 6513  | 16.0              | 1.32(1.03, 1.68)*   | 0.98(0.75, 1.27)                       |
| <b>Alcohol-related diseases</b> |       |       |                   |                     |                                        |
| No                              | 280   | 35531 | 7.88              | 1.00                | 1.00                                   |
| Yes                             | 31    | 5348  | 5.80              | 1.03(0.73, 1.46)    | -                                      |
| <b>Biliary stone</b>            |       |       |                   |                     |                                        |
| No                              | 255   | 36683 | 6.95              | 1.00                | 1.00                                   |
| Yes                             | 56    | 4196  | 13.3              | 1.09(0.81, 1.47)    | -                                      |
| <b>Asthma</b>                   |       |       |                   |                     |                                        |
| No                              | 270   | 38108 | 7.09              | 1.00                | 1.00                                   |
| Yes                             | 41    | 2772  | 14.8              | 1.36(0.99, 1.87)    | -                                      |
| <b>Hypercalcemia</b>            |       |       |                   |                     |                                        |
| No                              | 311   | 40870 | 7.61              | 1.00                | 1.00                                   |
| Yes                             | 0     | 10    | 0.00              | -                   | -                                      |
| <b>Hyperparathyroidism</b>      |       |       |                   |                     |                                        |
| No                              | 311   | 40799 | 7.62              | 1.00                | 1.00                                   |
| Yes                             | 0     | 81    | 0.00              | -                   | -                                      |
| <b>Coexisting complications</b> |       |       |                   |                     |                                        |
| <b>Sepsis</b>                   |       |       |                   |                     |                                        |
| No                              | 303   | 40353 | 7.51              | 1.00                | 1.00                                   |
| Yes                             | 8     | 527   | 15.2              | 1.01(0.50, 2.03)    | -                                      |
| Yes                             | 7     | 595   | 11.8              | 0.81(0.39, 1.70)    | -                                      |
| <b>Medication</b>               |       |       |                   |                     |                                        |
| <b>Steroid</b>                  |       |       |                   |                     |                                        |
| No                              | 206   | 33516 | 6.15              | 1.00                | 1.00                                   |
| Yes                             | 105   | 7364  | 14.3              | 1.42(1.02, 1.99)*   | 1.29(0.92, 1.81)                       |

CI, confidence interval; SHR, subhazard ratio; PY, person-years;

Rate<sup>#</sup>, incidence rate, per 1,000 person-years;

<sup>&</sup>Multivariable analysis including age, sex, hypertension, folate deficiency, depression, fibromyalgia, and coronary artery disease, and medications of steroid;

\*p<0.05

\*\*p<0.01

\*\*\*p<0.001

<https://doi.org/10.1371/journal.pone.0179358.t002>

present study, we used propensity score weighting to adjust for a wide range of confounding factors of osteoporosis. Our analysis revealed that compared with the non-AP cohort, the AP cohort had a 1.27-fold risk of osteoporosis. The risk of osteoporosis was 4.71 in patients who experienced >3 episodes of AP. The presumed association between AP and osteoporosis, was confirmed by this study. We found that AP has remote lasting effects on bone mineral density rather than just a single episode of pancreas inflammation.

We proposed several explanations for our findings that the AP cohort had a higher risk of osteoporosis. First, AP progresses to CP with time. Although the underlying mechanism is

**Table 3. Incidences and subhazard ratios of osteoporosis between subjects with and without acute pancreatitis.**

| Variable                       | Acute pancreatitis |       |                   |       |       |                   | Crude SHR (95% CI) | Adjusted SHR <sup>&amp;</sup> (95% CI) |
|--------------------------------|--------------------|-------|-------------------|-------|-------|-------------------|--------------------|----------------------------------------|
|                                | Yes                |       |                   | No    |       |                   |                    |                                        |
|                                | Event              | PY    | Rate <sup>#</sup> | Event | PY    | Rate <sup>#</sup> |                    |                                        |
| <b>Age, year</b>               |                    |       |                   |       |       |                   |                    |                                        |
| 20–49                          | 27                 | 11954 | 2.26              | 16    | 11496 | 1.39              | 1.59(0.96, 2.64)   | 1.53(0.87, 2.68)                       |
| 50–64                          | 53                 | 4457  | 11.9              | 41    | 5100  | 8.04              | 1.72(1.20, 2.46)** | 1.99(1.33, 2.97)***                    |
| ≥ 65                           | 84                 | 3551  | 23.7              | 90    | 4323  | 20.8              | 1.18(0.91, 1.53)   | 1.19(0.90, 1.59)                       |
| <b>Sex</b>                     |                    |       |                   |       |       |                   |                    |                                        |
| Female                         | 113                | 6162  | 18.3              | 89    | 6679  | 13.3              | 1.47(1.12, 1.93)** | 1.43(1.10, 1.85)**                     |
| Male                           | 51                 | 13799 | 3.70              | 58    | 14239 | 4.07              | 0.82(0.58, 1.17)   | 0.92(0.63, 1.35)                       |
| <b>Comorbidity<sup>§</sup></b> |                    |       |                   |       |       |                   |                    |                                        |
| No                             | 16                 | 4976  | 3.22              | 13    | 6408  | 2.03              | 1.70(0.85, 3.41)   | 2.08(1.01, 4.26)*                      |
| Yes                            | 148                | 14986 | 9.88              | 134   | 14510 | 9.23              | 1.08(0.86, 1.34)   | 1.19(0.95, 1.49)                       |
| <b>Steroid</b>                 |                    |       |                   |       |       |                   |                    |                                        |
| No                             | 139                | 18795 | 7.39              | 132   | 19777 | 6.67              | 1.08(0.86, 1.35)   | 1.22(0.97, 1.53)                       |
| Yes                            | 25                 | 1163  | 21.5              | 15    | 1141  | 13.2              | 1.66(0.91, 3.04)   | 1.92(1.04, 3.53)*                      |

CI, confidence interval; SHR, subhazard ratio; PY, person-years;

Rate<sup>#</sup>, incidence rate, per 1,000 person-years;

<sup>&</sup>Multivariable analysis including age, sex, hypertension, folate deficiency, depression, fibromyalgia, and coronary artery disease, and medications of steroid;

<sup>§</sup>Subjects with any comorbidity of hypertension, diabetes mellitus, hyperlipidemia, stroke, COPD, cirrhosis, CKD, cancer, folate deficiency, depression, hyperthyroidism, hypothyroidism, fibromyalgia, coronary artery disease, alcohol-related diseases, biliary stone, asthma, hypercalcemia, and hyperparathyroidism were classified into the comorbidity group;

\*p<0.05

\*\*p<0.01

\*\*\*P<0.001

<https://doi.org/10.1371/journal.pone.0179358.t003>

unclear, the pancreas developed CP-like lesions with calcifications after an episode of AP [8]. Yadav et al. reported recurrent episodes of AP, smoking, and alcohol as some of the risk factors for progression to CP [15]. Furthermore, Haaber et al. reported an association between CP and decreased bone mass [16]. Our finding that patients who experienced >3 episodes of AP

**Table 4. The risk of osteoporosis among acute pancreatitis patients receiving different frequency for medical visits in Cox proportional hazard regression.**

| Frequency for medical visit, per 1 years | Event | PY    | Rate <sup>#</sup> | Crude SHR (95% CI)  | Adjusted SHR <sup>&amp;</sup> (95% CI) |
|------------------------------------------|-------|-------|-------------------|---------------------|----------------------------------------|
| <b>None-acute pancreatitis</b>           | 147   | 20918 | 7.03              | 1.00                | 1.00                                   |
| <b>Acute pancreatitis</b>                |       |       |                   |                     |                                        |
| ≤3                                       | 143   | 19264 | 7.42              | 1.02(0.82, 1.27)    | 1.19(0.95, 1.50)                       |
| > 3                                      | 21    | 697   | 30.1              | 3.84(2.43, 6.05)*** | 4.76(2.99, 7.59)***                    |
| p for trend                              |       |       |                   |                     | <0.0001                                |
| Frequency for medical visits             |       |       |                   | 1.01(1.01, 1.02)*** | 1.01(1.01, 1.02)***                    |

CI, confidence interval; PY, person-years; SHR, subhazard ratio;

Rate<sup>#</sup>, incidence rate, per 1,000 person-years;

<sup>&</sup>Multivariable analysis including age, sex, hypertension, folate deficiency, depression, fibromyalgia, and coronary artery disease, and medications of steroid;

\*\*\*P<0.001

<https://doi.org/10.1371/journal.pone.0179358.t004>



were at a relatively higher risk of osteoporosis was consistent with the aforementioned findings. Episodes of AP would result in progression to CP, causing pancreatic insufficiency [17]. Malabsorption of fat occurs because of a shortage in pancreatic enzymes, resulting in fat-soluble (A, D, E, and K) vitamin deficiencies. Vitamin K participated in the gamma-carboxylation of osteocalcin, protecting against osteoporosis [18]. The chief hormonal form of vitamin D, 1,25(OH)<sub>2</sub>D, stimulates various signaling pathways and calcium transport across the cell membranes [19]. Patients with prolonged vitamin K and vitamin D deficiencies might be predisposed to osteoporosis.

Second, episodes of AP induce systemic inflammation, causing impaired bone metabolism and osteoporosis. A study hypothesized that even a single AP episode can initiate a sentinel of uncontrolled inflammatory processes [20]. High levels of chemokines, such as CCL2/MCP-1, neutrophil chemoattractant, CX3CL1/fractalkine, CXCR2, CCR1, interleukin (IL)-6, IL-8, IL-10, and soluble TNF-gamma, have been reported in AP or CP [21–24]. Duggan et al. reported that patients with CP who developed osteoporosis exhibited high levels of IL-6 and high-sensitivity C-reactive protein [21]. Redlich et al. indicated that chronic inflammation in the entire body could affect bone metabolism and induce bone loss [25]. Several chronic inflammation disorders, such as fibromyalgia [26], COPD [27], and peritonitis [28], have been strongly associated with osteoporosis. To determine the association between AP and osteoporosis, we excluded patients with CP to avoid CP interference. Furthermore, we proposed that single or multiple episodes of AP might induce a cascade of inflammatory processes in the pancreas, exerting systemic effects on bone metabolism and consequently causing osteoporosis. This may be another possible mechanism contributing to the high risk of osteoporosis in patients with AP, apart from the AP-induced pancreatic exocrine insufficiency pathway.

However, our study has a few limitations. First, information on the individual characteristics, such as smoking, alcohol consumption, exercise, and sunlight exposure, that might be risk factors for osteoporosis were unavailable in the NHIRD. For overcoming this limitation, we considered comorbidities, such as COPD and alcohol-related diseases, as alternatives to the smoking and alcohol-drinking habits, respectively. Moreover, Taiwan is a small island located within 22–25° 0' N; therefore, differences because of variable sunlight exposure among individuals would be subtle. Second, detailed data of pancreatic function tests, secretin-enhanced magnetic retrograde cholangiopancreatography, or endoscopic ultrasound for delineating the pancreatic morphology and functional capacity of each individual were not obtained. Therefore, the association between the sequels of AP, i.e. morphologic changes and exocrine functional changes of pancreas, and risk of osteoporosis could not be investigated. Finally, because the NHIRD encrypts patient personal information to protect privacy and provides researchers with anonymous identification numbers, therefore, lack of individual subject's BMD and Z-score data is the other study limitation.

Our study has several notable advantages. First, the NHIRD has a universal coverage and is a comprehensive longitudinal medical database of insureds. NHIRD covers a highly representative sample of Taiwan's general population because the reimbursement policy is universal and operated by a single-buyer, the government in Taiwan. All insurance claims should be scrutinized by medical reimbursement specialists and peer review according to the standard diagnosed criteria (such as BMD) in the study. If these doctors or hospitals make wrong diagnoses or coding, they will be punished with a lot of penalties. Therefore, the diagnoses of osteoporosis based on ICD-9 codes in this study were highly reliable. In addition, some related studies with the same diagnosed method and criteria for osteoporosis by ICD-9 coding were already been published [29–33]. Second, our study considered the comorbidities that could be risk factors for osteoporosis and propensity-score matched these comorbidities between the

study (AP) and control (non-AP) cohorts. In addition, our study design minimized the potential selection bias and clearly investigated the association between AP and osteoporosis.

Furthermore, our study suggested that AP is associated with an increased risk of osteoporosis. This large nationwide cohort study provided clinical information that may be useful in the primary prevention of osteoporosis in patients with AP.

## Supporting information

**S1 Checklist.** Checklist of items that should be included in reports of observational studies. (DOC)

## Author Contributions

**Conceptualization:** SYL CHK.

**Data curation:** SYL WHH CCL CLL CHT CHK.

**Formal analysis:** SYL WHH CCL CLL CHT CHK.

**Funding acquisition:** CHK.

**Investigation:** SYL CHK.

**Methodology:** CLL CHK.

**Project administration:** CHK.

**Resources:** SYL CHK.

**Software:** CLL CHK.

**Supervision:** CHK.

**Validation:** SYL WHH CCL CLL CHT CHK.

**Visualization:** SYL WHH CCL CLL CHT CHK.

**Writing – original draft:** SYL WHH CCL CLL CHT CHK.

**Writing – review & editing:** SYL WHH CCL CLL CHT CHK.

## References

1. Dujsikova H, Dite P, Tomandl J, Sevcikova A, Precechtelova M. Occurrence of metabolic osteopathy in patients with chronic pancreatitis. *Pancreatology*. 2008; 8:583–6. <https://doi.org/10.1159/000159845> PMID: 18824882
2. Ström O, Borgström F, Kanis JA, Compston J, Cooper C, McCloskey EV, et al. Osteoporosis: burden, health care provision and opportunities in the EU: a report prepared in collaboration with the International Osteoporosis Foundation (IOF) and the European Federation of Pharmaceutical Industry Associations (EFPIA). *Arch Osteoporos*. 2011; 6:59–155. <https://doi.org/10.1007/s11657-011-0060-1> PMID: 22886101
3. Hernlund E, Svedbom A, Ivergård M, Compston J, Cooper C, Stenmark J, et al. Osteoporosis in the European Union: medical management, epidemiology and economic burden. A report prepared in collaboration with the International Osteoporosis Foundation (IOF) and the European Federation of Pharmaceutical Industry Associations (EFPIA). *Arch Osteoporos*. 2013; 8:136. <https://doi.org/10.1007/s11657-013-0136-1> PMID: 24113837
4. Cosman F, de Beur SJ, LeBoff MS, Lewiecki EM, Tanner B, Randall S, et al. Clinician's Guide to Prevention and Treatment of Osteoporosis. *Osteoporos Int*. 2014; 25:2359–81. <https://doi.org/10.1007/s00198-014-2794-2> PMID: 25182228

5. Siris ES, Adler R, Bilezikian J, Bolognese M, Dawson-Hughes B, Favus MJ, et al. The clinical diagnosis of osteoporosis: a position statement from the National Bone Health Alliance Working Group. *Osteoporos Int*. 2014; 25:1439–43. <https://doi.org/10.1007/s00198-014-2655-z> PMID: 24577348
6. Jeremiah MP, Unwin BK, Greenawald MH, Casiano VE. Diagnosis and Management of Osteoporosis. *Am Fam Physician*. 2015; 92:261–8. PMID: 26280231
7. Duggan SN, Purcell C, Kilbane M, O'Keane M, McKenna M, Gaffney P, et al. An association between abnormal bone turnover, systemic inflammation, and osteoporosis in patients with chronic pancreatitis: a case-matched study. *Am J Gastroenterol*. 2015; 110:336–45. <https://doi.org/10.1038/ajg.2014.430> PMID: 25623657
8. Guda NM, Romagnuolo J, Freeman ML. Recurrent and relapsing pancreatitis. *Curr Gastroenterol Rep*. 2011; 13:140–9. <https://doi.org/10.1007/s11894-011-0176-x> PMID: 21286872
9. Database NHIR. Taiwan, <http://nhird.nhri.org.tw/en/index.html> (cited in 2016).
10. Hu WS, Lin CL, Huang CY, Chang SS, Chang KC. Cataract increases the risk of peripheral artery occlusive disease: A nationwide population-based cohort study with propensity score. *Int J Cardiol*. 2016; 220:768–71. <https://doi.org/10.1016/j.ijcard.2016.06.084> PMID: 27393864
11. Li HM, Yeh LR, Huang YK, Lin CL, Kao CH. The Association Between Barium Examination and Subsequent Appendicitis: A Nationwide Population-Based Study. *Am J Med*. 2017; 130:54–60.e5. <https://doi.org/10.1016/j.amjmed.2016.07.017> PMID: 27555093
12. Shen HN, Lu CL, Li CY. Epidemiology of first-attack acute pancreatitis in Taiwan from 2000 through 2009: a nationwide population-based study. *Pancreas* 2012; 41: 696–702. <https://doi.org/10.1097/MPA.0b013e31823db941> PMID: 22699142
13. Shen HN, Lu CL. Incidence, resource use, and outcome of acute pancreatitis with/without intensive care: a nationwide population-based study in Taiwan. *Pancreas* 2011; 40:1: 10–15. <https://doi.org/10.1097/MPA.0b013e3181f7e750> PMID: 20938365
14. Shen HN, Lu CL, Li CY. Effect of Diabetes on Severity and Hospital Mortality in Patients With Acute Pancreatitis A national population-based study. *Diabetes Care* 2012; 35: 1061–1066. <https://doi.org/10.2337/dc11-1925> PMID: 22446175
15. Yadav D, O'Connell M, Papachristou GI. Natural history following the first attack of acute pancreatitis. *Am J Gastroenterol*. 2012; 107:1096–103. <https://doi.org/10.1038/ajg.2012.126> PMID: 22613906
16. Haaber AB, Rosenfalck AM, Hansen B, Hilsted J, Larsen S. Bone mineral metabolism, bone mineral density, and body composition in patients with chronic pancreatitis and pancreatic exocrine insufficiency. *Int J Pancreatol*. 2000; 27:21–7. <https://doi.org/10.1385/IJGC:27:1:21> PMID: 10811020
17. Martínez-Moneo E, Stigliano S, Hedström A, Kaczka A, Malvik M, Waldthaler A, et al. Deficiency of fat-soluble vitamins in chronic pancreatitis: A systematic review and meta-analysis. *Pancreatol*. 2016; 16:988–994 <https://doi.org/10.1016/j.pan.2016.09.008> PMID: 27681502
18. Pearson DA. Bone health and osteoporosis: the role of vitamin K and potential antagonism by anticoagulants. *Nutr Clin Pract*. 2007; 22:517–44. <https://doi.org/10.1177/0115426507022005517> PMID: 17906277
19. Bikle DD. Vitamin D and Bone. *Curr Osteoporos Rep*. 2012; 10:151–9. <https://doi.org/10.1007/s11914-012-0098-z> PMID: 22544628
20. Guda NM, Nøjgaard C. Recurrent acute pancreatitis and progression to chronic pancreatitis. *Pancreas*. 2015. <https://doi.org/10.3998/panc.2015.39>
21. Bhatia M, Hegde A. Treatment with antileukinate, a CXCR2 chemokine receptor antagonist, protects mice against acute pancreatitis and associated lung injury. *Regul Pept*. 2007; 138:40–8. <https://doi.org/10.1016/j.regpep.2006.08.006> PMID: 17014919
22. Fisić E, Poropat G, Bilic-Zulle L, Licul V, Milic S, Stimac D. The role of IL-6, 8, and 10, sTNF $\alpha$ , CRP, and pancreatic elastase in the prediction of systemic complications in patients with acute pancreatitis. *Gastroenterol Res Pract*. 2013; 2013:282645. <https://doi.org/10.1155/2013/282645> PMID: 23476635
23. Malmström ML, Hansen MB, Andersen AM, Ersbøll AK, Nielsen OH, Jørgensen LN, et al. Cytokines and organ failure in acute pancreatitis: inflammatory response in acute pancreatitis. *Pancreas*. 2012; 41:271–7. <https://doi.org/10.1097/MPA.0b013e3182240552> PMID: 21956639
24. Lesina M, Wörmann SM, Neuhöfer P, Song L, Algül H. Interleukin-6 in inflammatory and malignant diseases of the pancreas. *Semin Immunol*. 2014; 26:80–7. <https://doi.org/10.1016/j.smim.2014.01.002> PMID: 24572992
25. Redlich K, Smolen JS. Inflammatory bone loss: pathogenesis and therapeutic intervention. *Nat Rev Drug Discov*. 2012; 11: 234–250. <https://doi.org/10.1038/nrd3669> PMID: 22378270
26. Swezey RL, Adams J. Fibromyalgia: a risk factor for osteoporosis. *J Rheumatol*. 1999; 26:2642–4. PMID: 10606376

27. Ionescu AA, Schoon E. Osteoporosis in chronic obstructive pulmonary disease. *Eur Respir J Suppl.* 2003; 46:64s–75s. PMID: [14621108](#)
28. Wactawski-Wende J. Periodontal diseases and osteoporosis: association and mechanisms. *Ann Periodontol.* 2001; 6:197–208. <https://doi.org/10.1902/annals.2001.6.1.197> PMID: [11887465](#)
29. Chen CH, Lin CL, Kao CH. Gastroesophageal reflux disease with proton pump inhibitor use is associated with an increased risk of osteoporosis: a nationwide population-based analysis. *Osteoporos Int.* 2016; 27:2117–26. <https://doi.org/10.1007/s00198-016-3510-1> PMID: [26860609](#)
30. Lee CW, Muo CH, Liang JA, Sung FC, Hsu CY, Kao CH. Increased osteoporosis risk in dermatomyositis or polymyositis independent of the treatments: a population-based cohort study with propensity score. *Endocrine.* 2016; 52:86–92. <https://doi.org/10.1007/s12020-015-0756-x> PMID: [26429781](#)
31. Chen SJ, Liao WC, Huang KH, Lin CL, Tsai WC, Kung PT, et al. Chronic obstructive pulmonary disease and allied conditions is a strong independent risk factor for osteoporosis and pathologic fractures: a population-based cohort study. *QJM.* 2015; 108:633–40. <https://doi.org/10.1093/qjmed/hcv012> PMID: [25614611](#)
32. Lee CW, Liao CH, Lin CL, Liang JA, Sung FC, Kao CH. Increased risk of osteoporosis in patients with depression: a population-based retrospective cohort study. *Mayo Clin Proc.* 2015; 90:63–70. <https://doi.org/10.1016/j.mayocp.2014.11.009> PMID: [25572194](#)
33. Tsai MS, Lin CL, Tu YK, Lee PH, Kao CH. Risks and predictors of osteoporosis in patients with inflammatory bowel diseases in an Asian population: a nationwide population-based cohort study. *Int J Clin Pract.* 2015; 69:235–41. <https://doi.org/10.1111/ijcp.12526> PMID: [25472555](#)
